# Supplementary material for: Nitrogen and sulphur co-doped carbon quantum dots and their optical power limiting properties
Source: Royal Society of Chemistry journal article supplement (doi:10.1039/d0ma00106f), 2020-01-01
Supplement: d0ma00106f1.pdf [file d0ma00106f1.pdf]

# Nitrogen and sulphur co-doped carbon quantum dots and their optical power limiting properties

Senqiang Zhu,<sup>a</sup> Kunyan Wang,<sup>a</sup> Jinyang Hu,<sup>a</sup> Rui Liu\*<sup>a</sup> and Hongjun Zhu\*<sup>a</sup>

<sup>a</sup> *Department of Applied Chemistry, School of Chemistry and Molecular Engineering,  
Nanjing Tech University, Nanjing, 211816, China*

<sup>b</sup> *School of Material Engineering, Jinling Institute of Technology, Nanjing, 211169,  
China*

\*Corresponding author.

Phone: +86-25-83172358. Fax: +86-25-83587428. E-mail: rui.liu@njtech.edu.cn (R. Liu), zhuhj@njtech.edu.cn (H. Zhu).

## 1. General Information

### Materials and Instruments

All solvents and reagents were purchased from Energy Chemical, and used as is unless otherwise stated. The synthetic routes for precursor **1** and CQDs are illustrated in Scheme S1. The synthesis of precursor **1** has been reported previously. The synthetic procedures and characterization data for precursor **1** and CQDs provided below.

A Tecnai F20 transmission electron microscope (TEM) was used to investigate the morphologies of CQDs. Atomic force microscopic (AFM) image was taken with MultiMode 3D. FT-IR spectra image was obtained from Nicolet 6700

spectrophotometer. Powder X-ray diffraction (XRD) patterns of the samples were collected on a Bruker D8 Advance powder diffractometer. DSC experiments were recorded on a NETZSCH DSC 204 instrument at a scanning rate of  $c10 \text{ K min}^{-1}$ . X-ray photoelectron spectroscopy (XPS) analysis was carried out on ESCALAB 250.

### **Photophysical and nonlinear optical measurements**

The spectroscopic grade solvents were used for the photophysical experiments. Optical absorption spectra were obtained by using a TU-1900 UV-vis spectrophotometer in different solvents. Photoluminescence spectra were carried out on a Hitachi F-4600 fluorescence spectrophotometer. The photostability experiments are carried out under 100W UV light, the intensities at 486 nm for **D-1** and at 535 nm for **D-2** are monitored every five or ten minutes. The NLO and OPL performances of the samples were investigated by Z-scan using a Nd:YAG laser (EKSPLA, PL2143B) and 532 nm pulses of 4 ns, operating at 10 Hz repetition rate. The Ti:sapphire regenerative amplifier (1000 nm, 35 fs, 1 kHz) excitation source was also employed. The focal length of the lens is 5 cm. beam size is 90  $\mu\text{m}$ . To facilitate comparison, all sample concentrations in dry DMF were adjusted to the same 70% linear transmittance at 532 nm in NLO and OPL experiments. All samples were measured in 1 mm quartz cells.

## **2. Synthesis of precursor 1 and CQDs.**

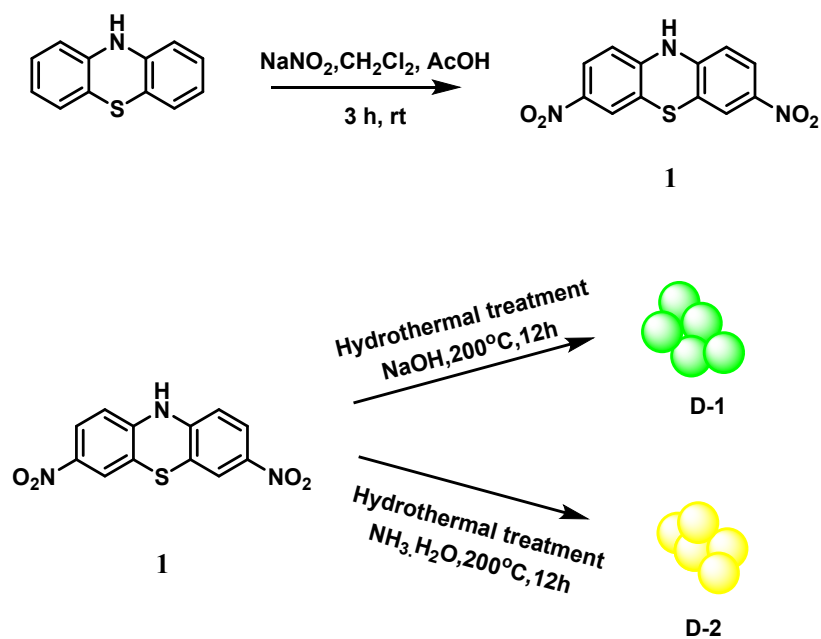

**Scheme S1** Synthetic procedures of precursor **1** and CQDs

### Synthesis of precursor **1**

Phenothiazine (100 mmol, 20 g) were dissolved in  $\text{CH}_2\text{Cl}_2$  (100 mL) and  $\text{CH}_3\text{COOH}$  (40 mL), The mixture was stirred at R.T. Then Sodium nitrite (300 mmol, 20 g) was added and stirred for another 1 h. The reaction mixture was quenched with water and extracted in dichloromethane. The combined organic extracts were dried over anhydrous  $\text{Na}_2\text{SO}_4$  and concentrated by rotary evaporation. The crude product was purified by column chromatography on silica gel eluted with mixed solvent of petroleum ether–dichloromethane (2 : 1) to afford a purple solid in a yield of 82%.  $^1\text{H}$  NMR(400 MHz;  $\text{DMSO}-d_6$ ): 6.69 (d,  $J = 4\text{Hz}$ , 2H), 7.70 (s, 2H), 7.82 (d,  $J = 4\text{Hz}$ , 2H). HRMS (ESI)  $m/z$  calc. for  $\text{C}_{12}\text{H}_8\text{N}_3\text{O}_4\text{S}^+$  ( $\text{M}+\text{H}$ ) $^+$ : 290.0230, found: 290.0245. Elemental analysis calculated for  $\text{C}_{12}\text{H}_8\text{N}_3\text{O}_4\text{S}$ : C, 49.83; H, 2.44; N, 14.53; Found: C, 49.95; H, 2.51; N, 14.61.

### 3. Characterization and photophysical properties of D1 and D2

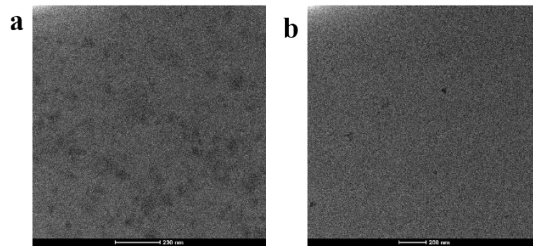

**Fig. S1** TEM images of the obtained **D-1** and **D-2**

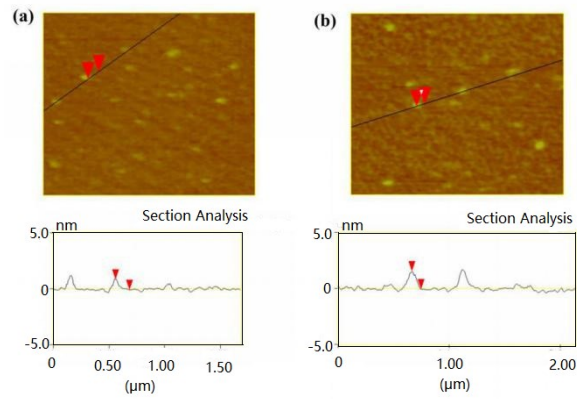

**Fig. S2** AFM image of **D-1**(a) and **D-2**(b).

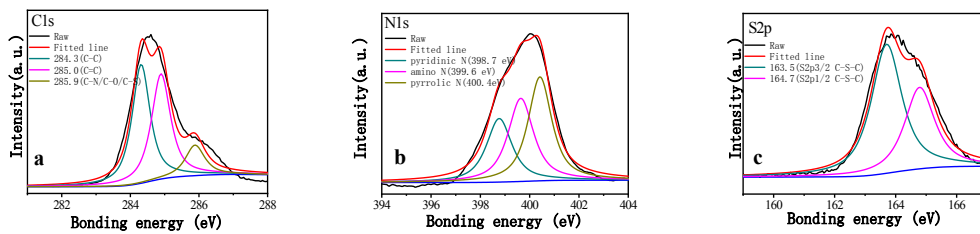

**Fig. S3** The amplified (a) C1s, (b) N1s and (c) S<sub>2p</sub> XPS spectra for **D-1**

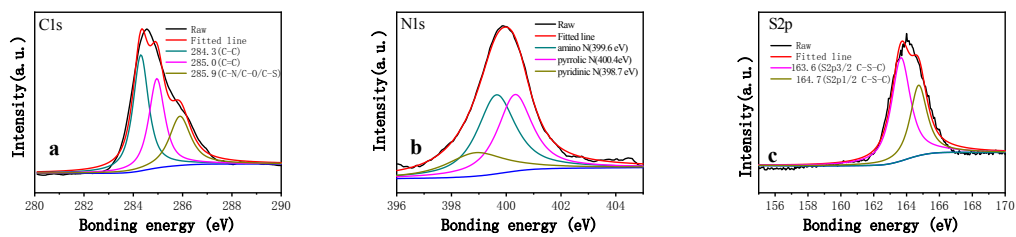

**Fig. S4** The amplified (a) C1s, (b) N1s and (c) S<sub>2p</sub> XPS spectra for **D-2**

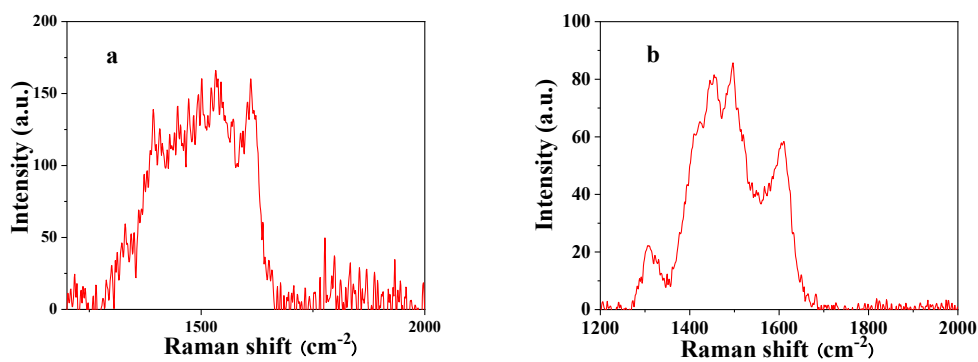

Fig. S5 Raman spectrum of D-1 and D-2

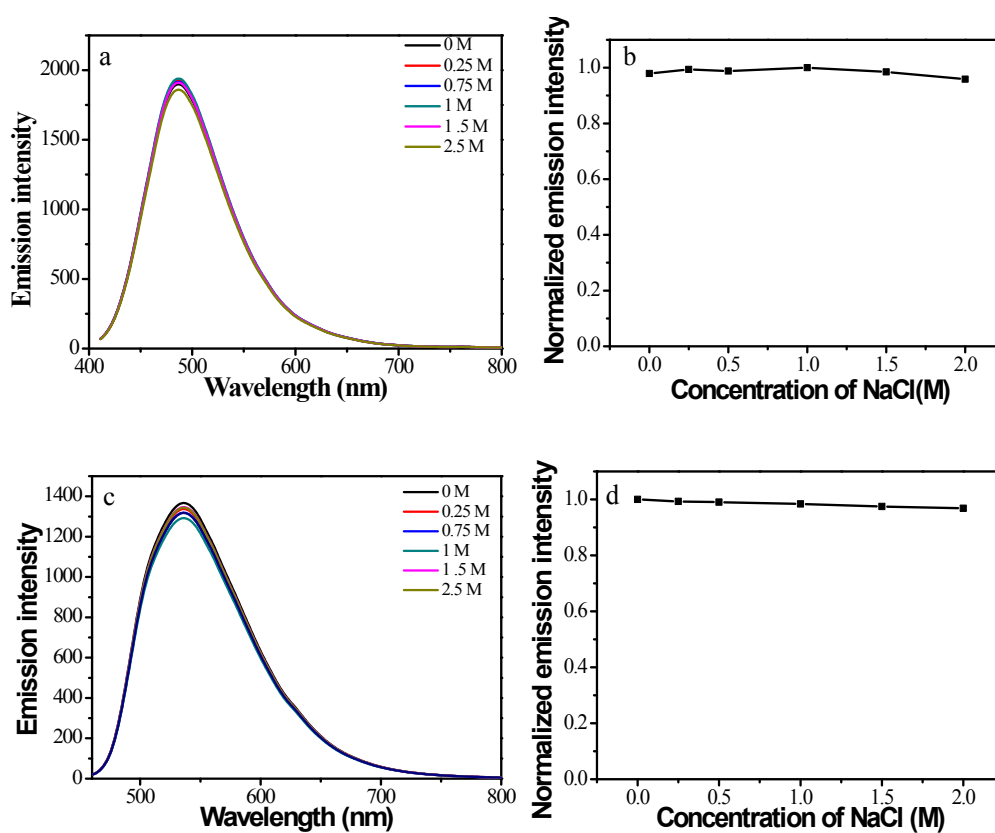

Fig. S6 Effect of ionic strength on the fluorescence intensity of D-1(a,b) and D-2(c,d), the fluorescence intensities are recorded at 486 nm and 535 nm for D-1 and D-2, respectively.

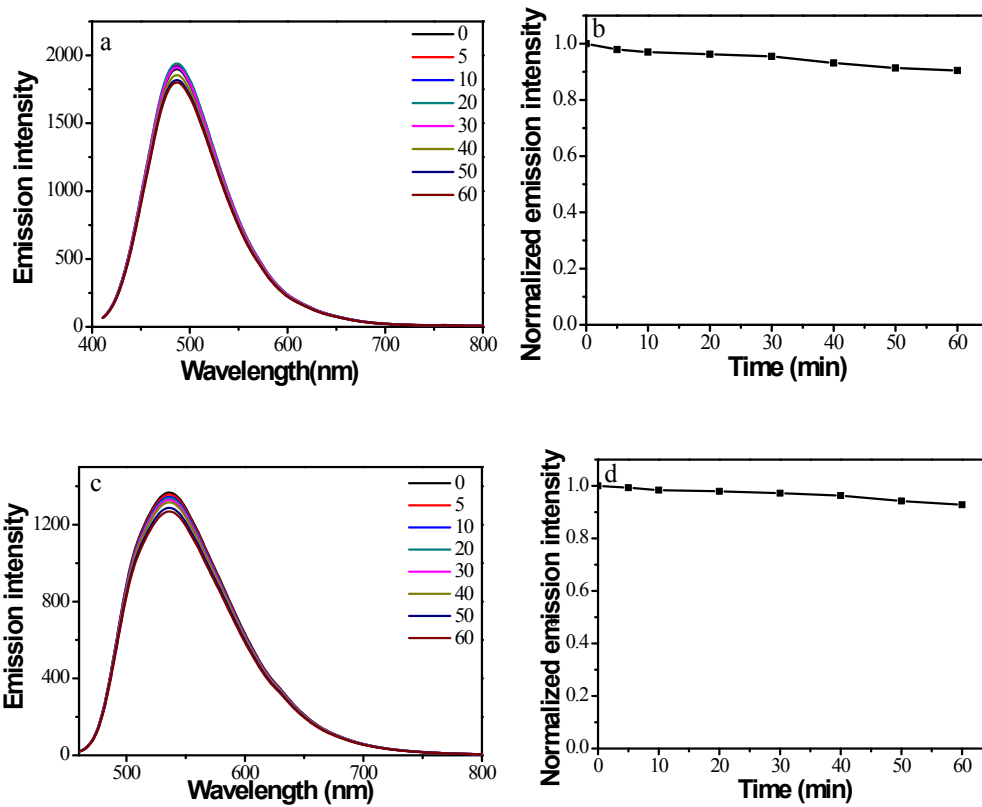

**Fig. S7** Photostability of **D-1**(a,b) and **D-2**(c,d) under 100W UV light, the fluorescence intensities are recorded at 486 nm and 535 nm for **D-1** and **D-2**, respectively.

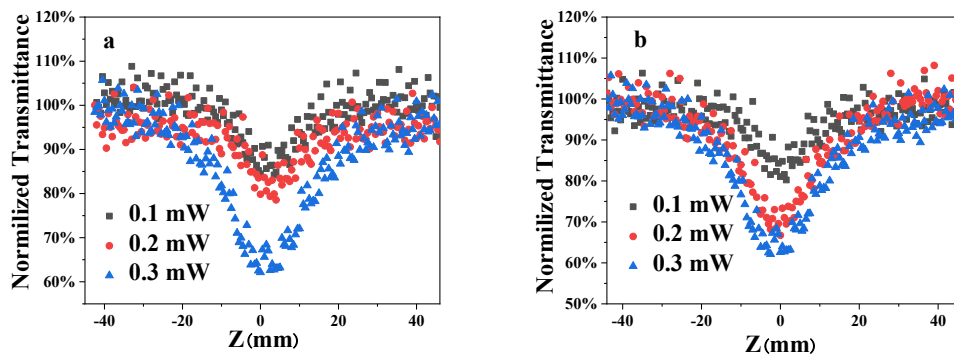

**Fig. S8** Intensity dependent open-aperture Z-scan curves **D-1** (a) and **D-2** (b) with the same linear transmittance of 70% to 35 fs, 1000 nm optical pulses.

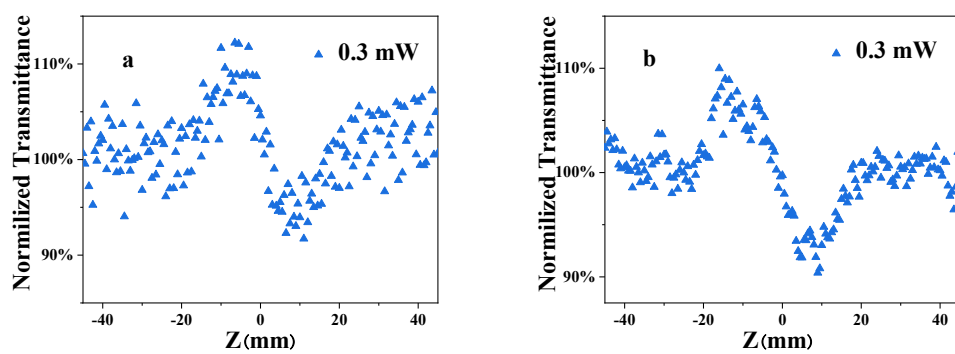

**Fig. S9** Close-aperture Z-scan curves **D-1** (a) and **D-2** (b) with the same linear transmittance of 70% to 35 fs, 1000 nm optical pulses.
